# Supplementary material
Source: PubMed Central journal article supplement (PMC5587125)
Supplement: NIHMS889871-supplement-supplement_1.pdf [file NIHMS889871-supplement-supplement_1.pdf]

## Supplement table:

**Table 11: Characteristics of patients not included in study (n=73) or CT scans (n=12) were not analyzable.**

| <b>Categories</b>             |                     | <b>N (%) No scan/no data</b> | <b>N (%) Patient's volume prevents evaluation of scan</b> |
|-------------------------------|---------------------|------------------------------|-----------------------------------------------------------|
| <b>Age</b>                    |                     |                              |                                                           |
|                               | Mean (SD)           | 64.4 (13.1)                  | 59.5 (10.0)                                               |
|                               | < 61 years          | 29 (25.0)                    | 7 (58.3)                                                  |
|                               | >61 years           | 87 (75.0)                    | 5 (41.7)                                                  |
| <b>Sex</b>                    |                     |                              |                                                           |
|                               | Male                | 37 (50.7)                    | 6 (50.0)                                                  |
|                               | Female              | 36 (49.3)                    | 6 (50.0)                                                  |
| <b>BMI (kg/m<sup>2</sup>)</b> |                     |                              |                                                           |
|                               | Mean (SD)           | 25.1 (3.9)                   | 32.4 (4.13)                                               |
|                               | Underweight (<18.5) | 2 (2.7)                      | 0 (0.0)                                                   |

|                                  |                                |           |           |
|----------------------------------|--------------------------------|-----------|-----------|
|                                  | Normal weight (18.5 – 24.99)   | 27 (37.0) | 1 (8.3)   |
|                                  | Overweight (25 – 29.99)        | 28 (38.4) | 3 (25.0)  |
|                                  | Obese Class I (30 – 34.99)     | 9 (12.3)  | 5 (41.7)  |
|                                  | Obese Class II & III (> 34.99) | 1 (1.4)   | 3 (25.0)  |
|                                  | Unknown                        | 6 (8.2)   | 0 (0.0)   |
| <b>Site of CRC</b>               |                                |           |           |
|                                  | Colon                          | 42 (57.5) | 7 (58.3)  |
|                                  | Recto sigmoid                  | 5 (6.9)   | 1 (8.3)   |
|                                  | Rectum                         | 20 (27.4) | 4 (33.3)  |
|                                  | Unknown                        | 6 (8.2)   | 0 (0.0)   |
| <b>Stage</b>                     |                                |           |           |
|                                  | 0                              | 0 (0.0)   | 0 (0.0)   |
|                                  | I                              | 21 (28.8) | 3 (37.3)  |
|                                  | II                             | 19 (26.0) | 4 (36.4)  |
|                                  | III                            | 13 (17.8) | 2 (18.2)  |
|                                  | IV                             | 3 (4.1)   | 0 (0.0)   |
|                                  | Unknown                        | 17 (23.3) | 2 (18.2)  |
| <b>Time of CT Scan</b>           |                                |           |           |
|                                  | Pre-op                         | 5 (6.9)   | 11 (91.7) |
|                                  | Post-op                        | 5 (6.9)   | 1 (8.3)   |
|                                  | No-scan                        | 63 (86.3) | 0 (0.0)   |
| <b>Metabolic<br/>Equivalents</b> |                                |           |           |
|                                  | Unknown                        | 73        | 12        |
